# Supplementary material
Source: Springer Nature journal article supplement (https://www.springermedizin.de/resource/supplementary/12978_2012_186_MOESM4_ESM.pdf/9602314)

**a**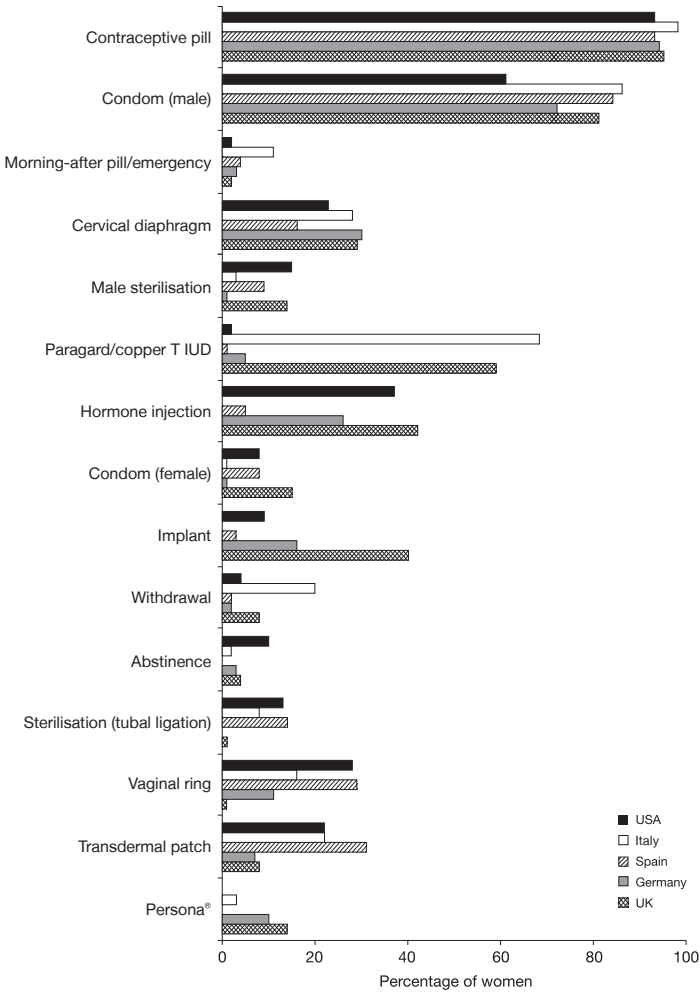**b**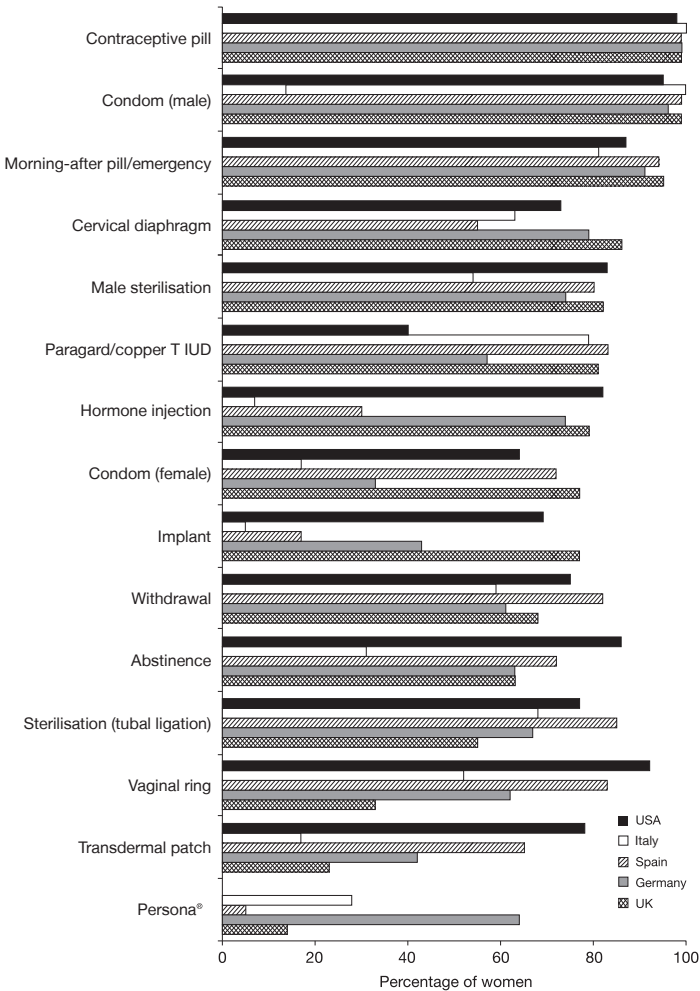

Supplement: MOESM4 [file 9602314]
